# Supplementary material for: Cooperative TRAIL production mediates IFNα/Smac mimetic-induced cell death in TNFα-resistant solid cancer cells
Source: PubMed Central journal article supplement (PMC4826164; doi:10.18632/oncotarget.6915), 2016-01-13
Supplement: oncotarget-07-3709-s001.pdf [file oncotarget-07-3709-s001.pdf]

# Cooperative TRAIL production mediates IFN $\alpha$ /Smac mimetic-induced cell death in TNF $\alpha$ -resistant solid cancer cells

## Supplementary Material

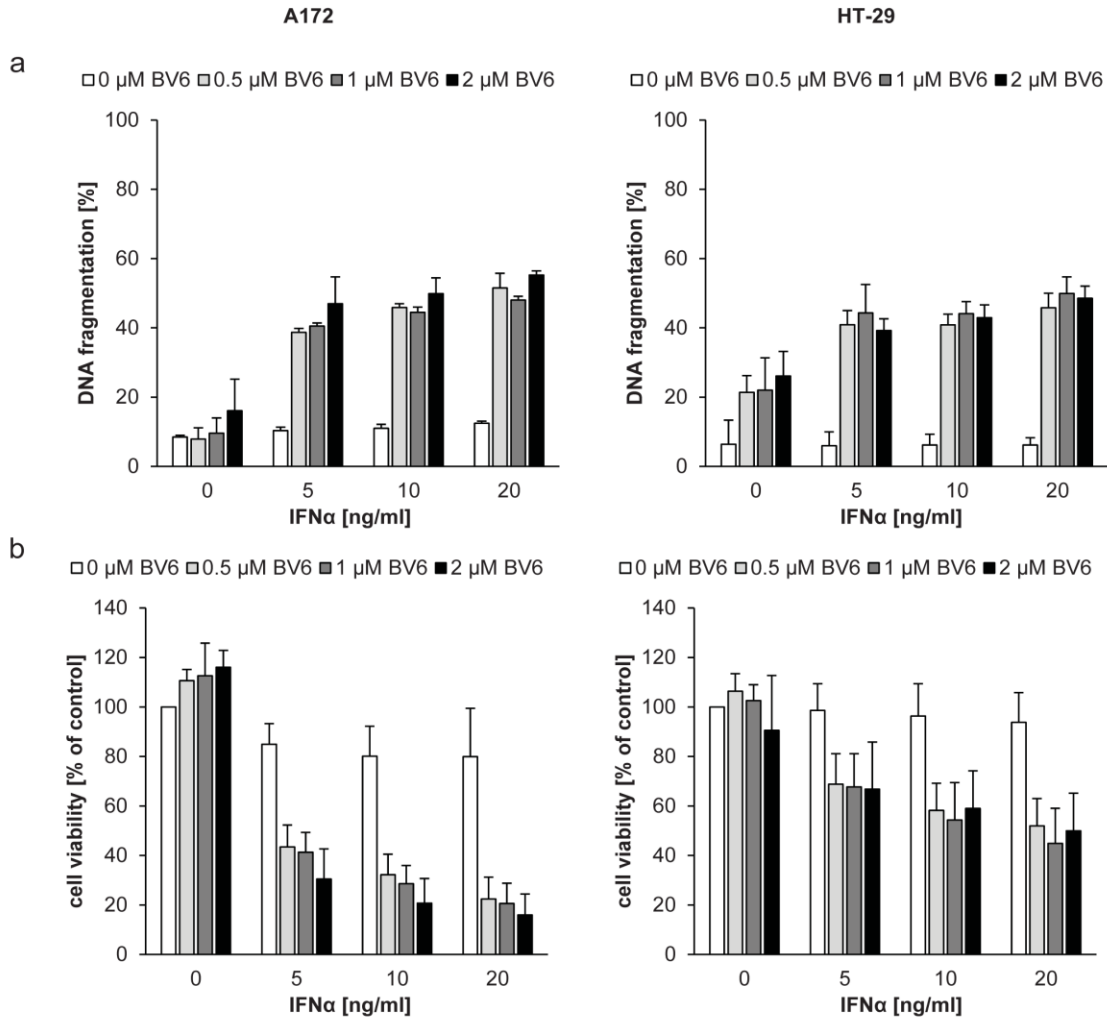

### Suppl. Fig. 1. IFN $\alpha$ /BV6 cotreatment synergistically induces cell death in A172 and HT-29 cells.

A172 and HT-29 cells were treated for 72 hours with indicated concentrations of IFN $\alpha$  and/or BV6. Cell death was determined by analysis of DNA fragmentation using flow cytometry and mean + SD of three independent experiments performed in duplicate are shown (A). Cell viability was determined by MTT assay and data are shown as percentage of untreated control cells with mean + SD of three independent experiments performed in triplicate (B).

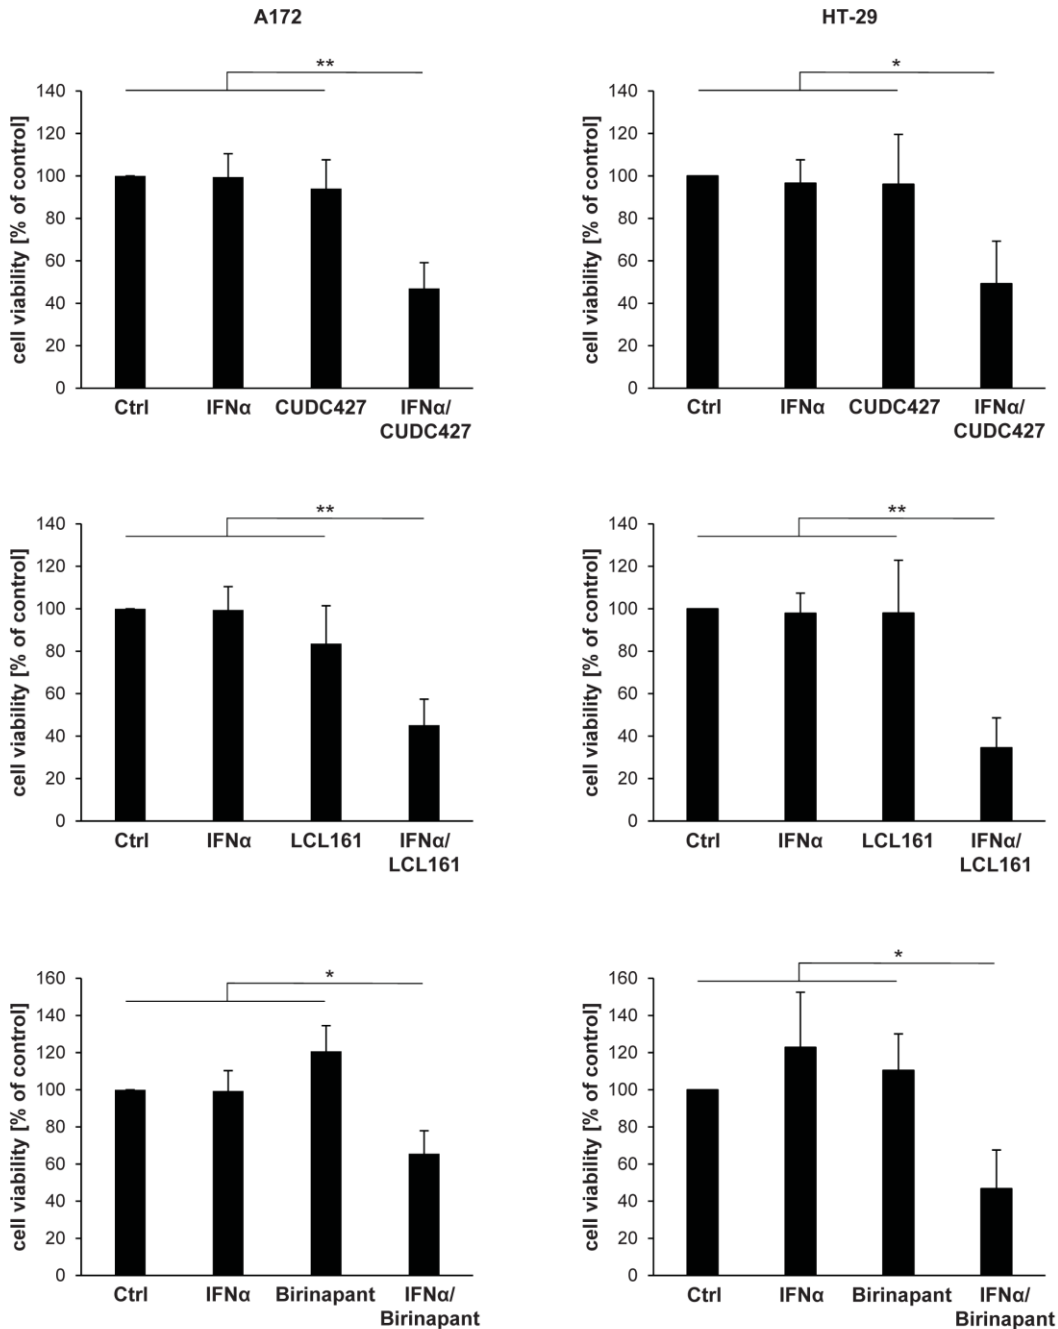

**Suppl. Fig. 2. Different Smac mimetics cooperate with IFN $\alpha$  to reduce cell viability.**

A172 and HT-29 cells were treated with 10 ng/ml IFN $\alpha$  and/or CUDC427, LCL161 (A172: 30  $\mu$ M; HT-29: 10  $\mu$ M) or 5  $\mu$ M Birinapant for 72 hours. Cell viability was determined by MTT assay and data are shown as percentage of untreated cells with mean + SD of three independent experiment performed in triplicate; \* P < 0.05; \*\* P < 0.01.

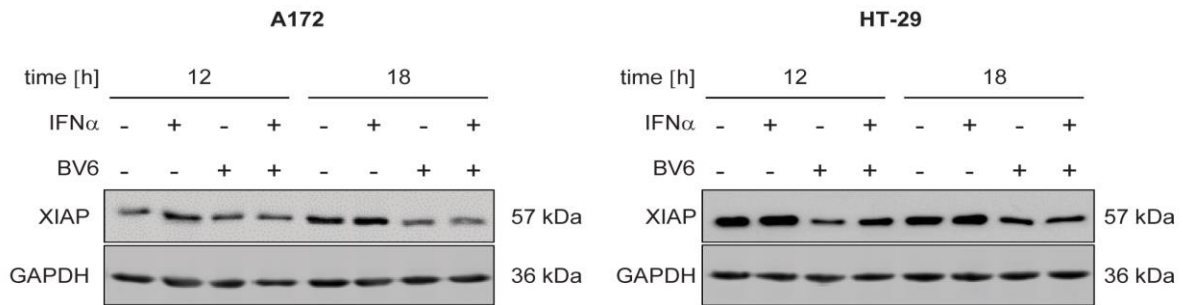

**Suppl. Fig. 3. Effect of IFN $\alpha$  and/or BV6 on XIAP protein expression.**

Cells were treated for 12 and 18 hours with IFN $\alpha$  (A172: 5 ng/ml, HT-29: 10 ng/ml) and/or 1  $\mu$ M BV6. Protein levels of XIAP were assessed by Western blotting, GAPDH was used as loading control.

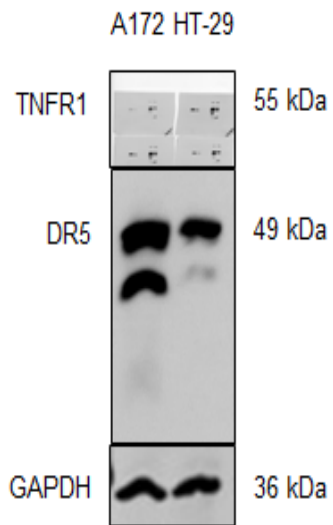

**Suppl. Fig. 4. TNFR1 and DR5 expression.**

Constitutive protein levels of TNFR1 and DR5 were assessed in untreated cells by Western blotting, GAPDH was used as loading control.

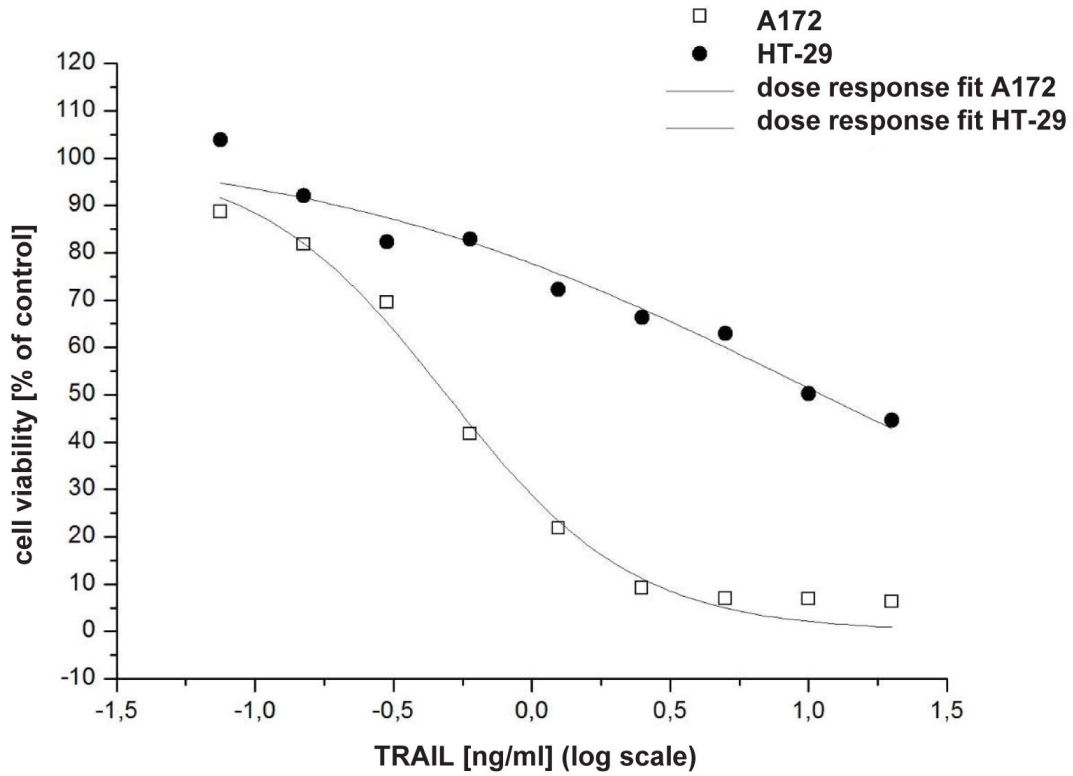

**Suppl. Fig. 5. Calculation of IC<sub>50</sub> values for TRAIL/BV6 cotreatment.**  
 IC<sub>50</sub> values for TRAIL/BV6 cotreatment were calculated by Origin data analysis software (OriginLab, Northampton, MA, USA).

**Suppl. Tab. 1. Synergistic induction of cell death by IFN $\alpha$  and BV6.**

Combination indices (CI) were calculated as described in Materials and Methods for DNA fragmentation (A) and cell viability (B) shown in suppl. Fig. 1 after treatment with indicated concentrations of IFN $\alpha$  and BV6. CI <0.9 indicates synergism, 0.9-1.1 additivity and >1.1 antagonism.

A172

HT-29

a

|                      |    | BV6 [ $\mu$ M] |       |       |
|----------------------|----|----------------|-------|-------|
|                      |    | 0.5            | 1     | 2     |
| IFN $\alpha$ [ng/ml] | 5  | 0.04           | 0.007 | 0.011 |
|                      | 10 | 0.002          | 0.005 | 0.007 |
|                      | 20 | 0.001          | 0.003 | 0.003 |

|                      |    | BV6 [ $\mu$ M] |       |       |
|----------------------|----|----------------|-------|-------|
|                      |    | 0.5            | 1     | 2     |
| IFN $\alpha$ [ng/ml] | 5  | 0.006          | 0.006 | 0.034 |
|                      | 10 | 0.006          | 0.006 | 0.015 |
|                      | 20 | 0.002          | 0.002 | 0.005 |

b

|                      |    | BV6 [ $\mu$ M] |       |       |
|----------------------|----|----------------|-------|-------|
|                      |    | 0.5            | 1     | 2     |
| IFN $\alpha$ [ng/ml] | 5  | 0.064          | 0.04  | 0.056 |
|                      | 10 | 0.042          | 0.075 | 0.072 |
|                      | 20 | 0.027          | 0.051 | 0.076 |

|                      |    | BV6 [ $\mu$ M] |       |       |
|----------------------|----|----------------|-------|-------|
|                      |    | 0.5            | 1     | 2     |
| IFN $\alpha$ [ng/ml] | 5  | 0.067          | 0.026 | 0.044 |
|                      | 10 | 0.068          | 0.022 | 0.039 |
|                      | 20 | 0.021          | 0.023 | 0.038 |
